# Supplementary material for: Phenotype, genotype, and worldwide genetic penetrance of LRRK2-associated Parkinson's disease: a case-control study
Source: PubMed Central journal article supplement (PMC2832754; doi:10.1016/s1474-4422(08)70117-0), 2008-07
Supplement: mmc1.pdf [file mmc1.pdf]

## Phenotype, genotype, and worldwide genetic penetrance of *LRRK2*-associated Parkinson's disease: a case-control study

Correspondence to:  
Daniel G Healy, Department of  
Clinical Neurosciences, Institute  
of Neurology, University College  
London, London WC1N 3BG, UK  
[danhealy@doctors.org.uk](mailto:danhealy@doctors.org.uk)

|                                                                                                                                                                                                                           | Screening for mutations that cause                                     |
|---------------------------------------------------------------------------------------------------------------------------------------------------------------------------------------------------------------------------|------------------------------------------------------------------------|
| Department of Neurodegenerative Diseases, Hertie-Institut for Clinical Brain Research, University of Tuebingen, Tuebingen, Germany ( <a href="mailto:thomas.gasser@uni-tuebingen.de">thomas.gasser@uni-tuebingen.de</a> ) | Screen for specific mutations and complete <i>LRRK2</i>                |
| UF de Neurogénétique, Département de Génétique et Cytogénétique, Hôpital de la Salpêtrière, Paris, France ( <a href="mailto:Cecile.Cazeneuve@psl.aphp.fr">Cecile.Cazeneuve@psl.aphp.fr</a> )                              | Only Gly2019Ser                                                        |
| Department of Neurogenetics, Institute of Neurology, Queen Square, London, UK ( <a href="mailto:m.davis@uclh.nhs.uk">m.davis@uclh.nhs.uk</a> )                                                                            | Only Gly2019Ser                                                        |
| Departments of Human Genetics and Neurology, University of Luebeck, Luebeck, Germany ( <a href="mailto:christine.klein@neuro.uni-luebeck.de">christine.klein@neuro.uni-luebeck.de</a> )                                   | Gly2019Ser and other proven pathogenic mutations if negative           |
| Medical Genetics Laboratory, Foundation IRCCS, Ospedale Maggiore Policlinico, Mangiagalli e Regina Elena, Milan, Italy ( <a href="mailto:labgen@policlinico.mi.it">labgen@policlinico.mi.it</a> )                         | Gly2019Ser, Ile2020Thr, Arg1441Cys, Arg1441Gly, Arg1441His             |
| Department of Clinical Genetics, Erasmus MC, Rotterdam, Netherlands ( <a href="mailto:DNADIAGNOSTIEK.CL15@erasmusmc.nl">DNADIAGNOSTIEK.CL15@erasmusmc.nl</a> )                                                            | Screen for specific mutations and complete <i>LRRK2</i>                |
| Laboratory of Neurogenetics, Department of Neuroscience, Mayo Clinic, Jacksonville ( <a href="mailto:farrer.matthew@mayo.edu">farrer.matthew@mayo.edu</a> )                                                               | Gly2019Ser, Ile2020Thr, Arg1441Cys, Arg1441Gly, Arg1441His, Tyr1699Cys |

A list of other, non-consortium test sites is available on <http://www.geneclinics.org>

**Webtable: *LRRK2* consortium sites that provide diagnostic (non-research) testing of *LRRK2***
